# Supplementary material for: The Composites of Polyamide 12 and Metal Oxides with High Antimicrobial Activity
Source: MDPI journal article supplement (doi:10.3390/polym14153025), 2022-07-26
Supplement: s1 [file s1]

## SUPPLEMENTARY DATA

The TGA curves obtained for PA12 composites containing 1-5wt% metal oxides

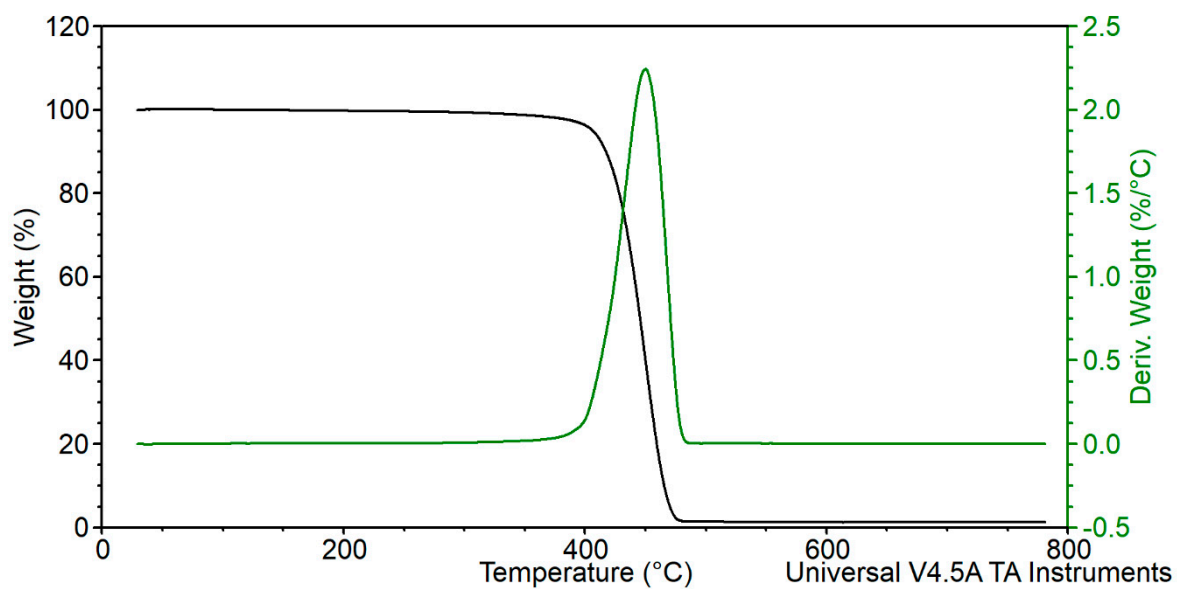

**Figure S1:** TGA curve of neat PA12.

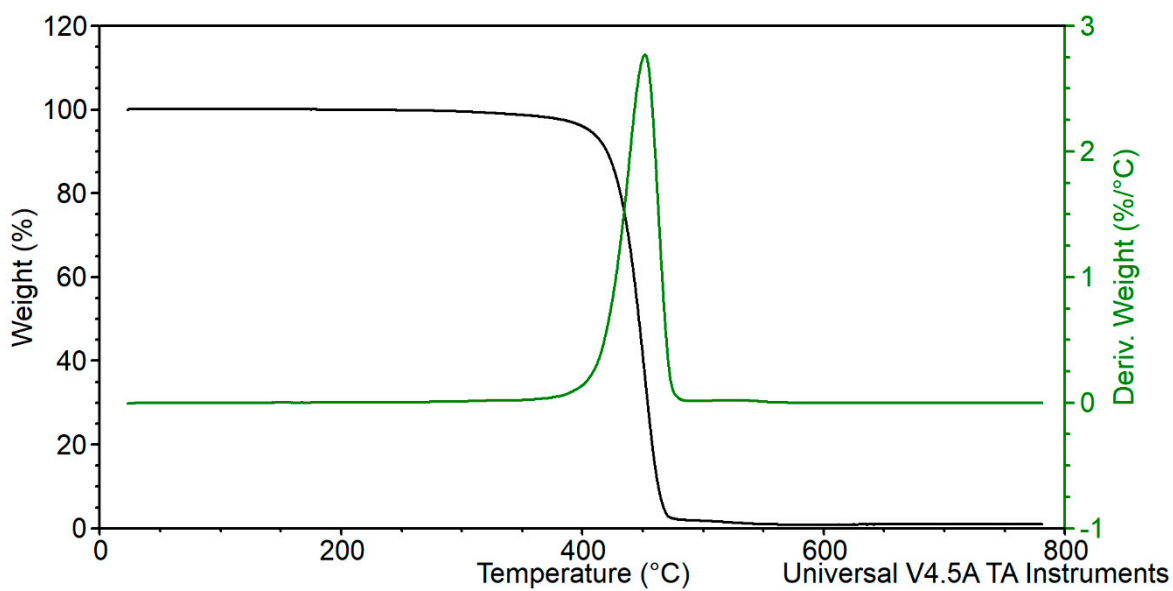

**Figure S2:** TGA curve of PA12+1wt% metal oxides.

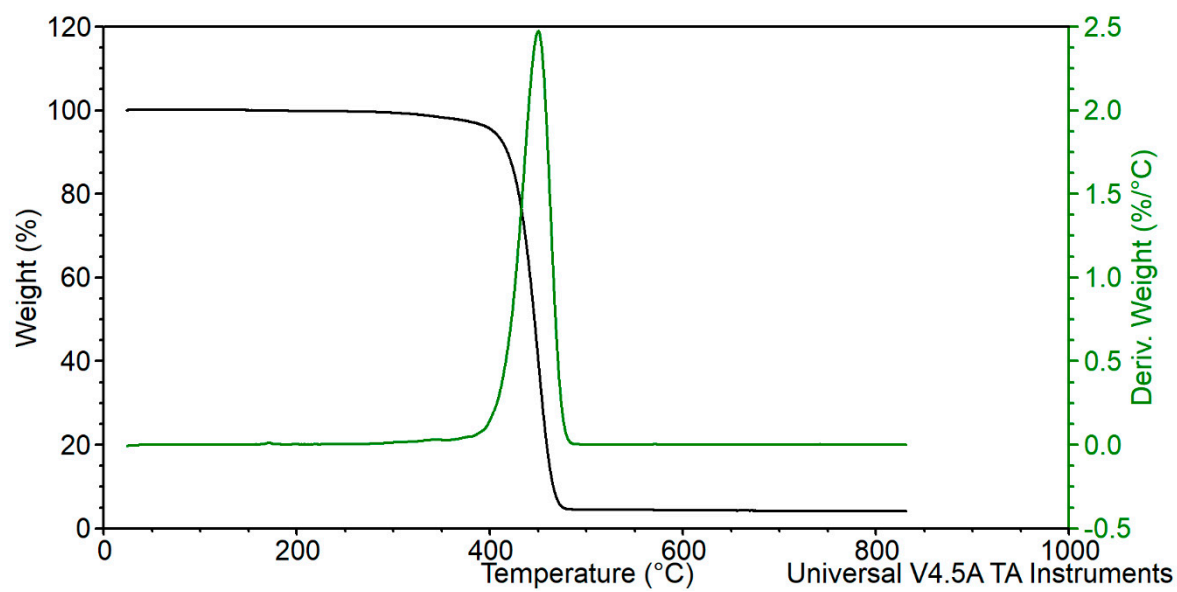

**Figure S3:** TGA curve of PA12+2wt% metal oxides.

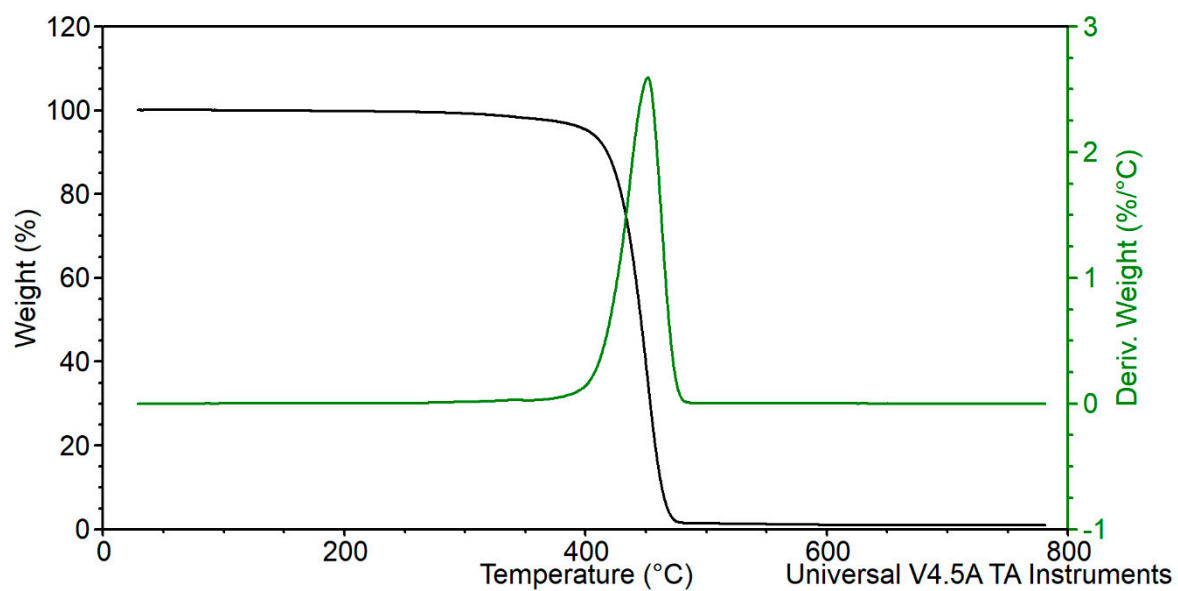

**Figure S4:** TGA curve of PA12+3wt% metal oxides.

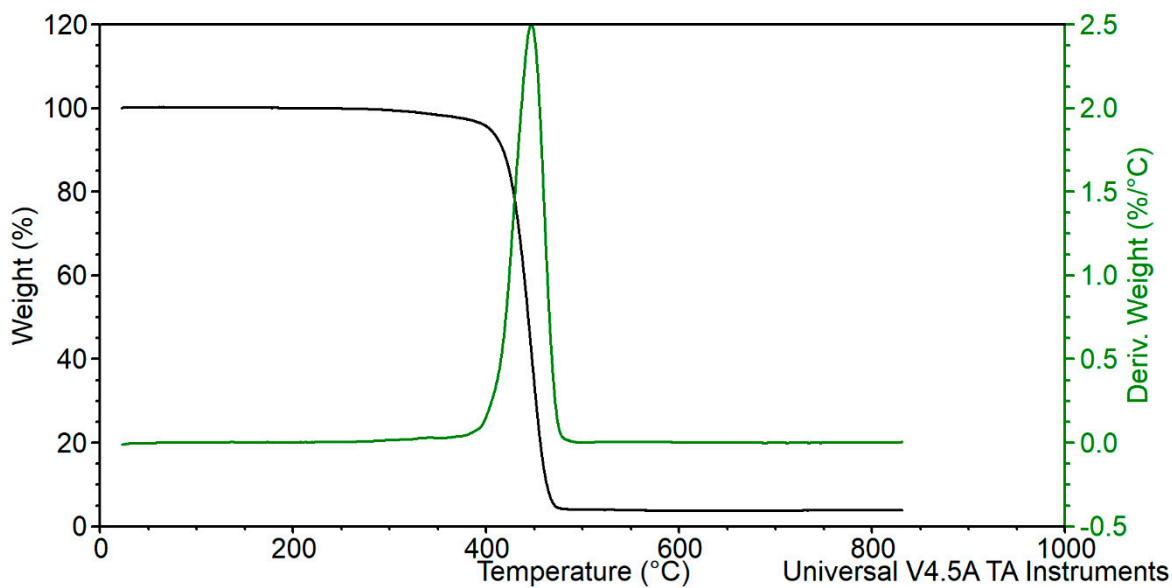

**Figure S5:** TGA curve of PA12+4wt% metal oxides.

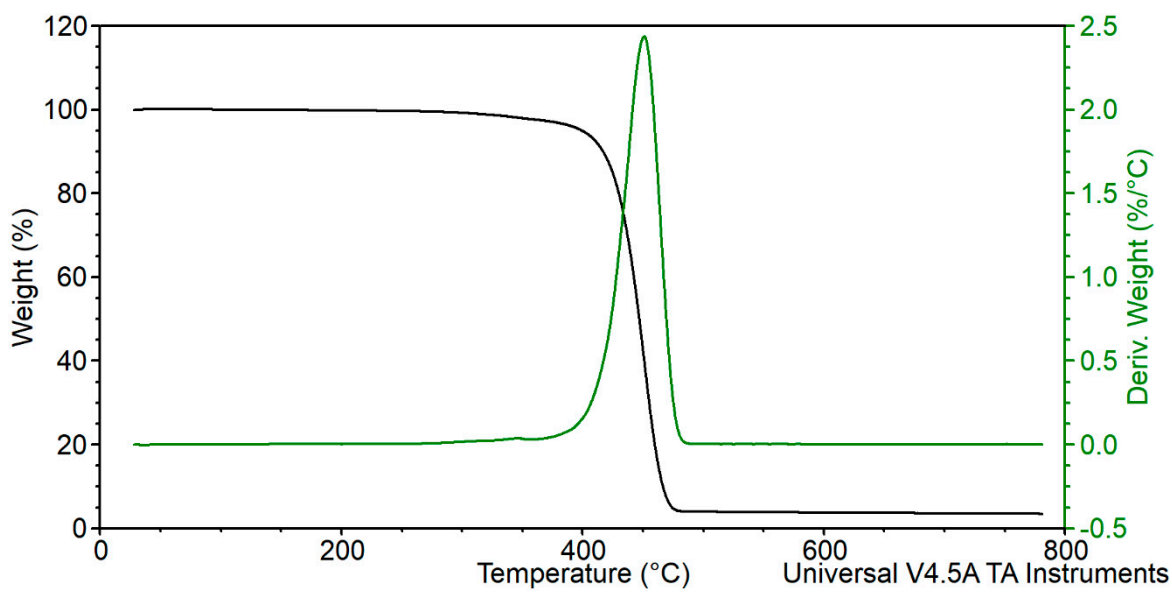

**Figure S6:** TGA curve of PA12+5wt% metal oxides.
